# Supplementary material for: Systematic Review on the Impact of Conditional Cash Transfers on Child Health Service Utilisation and Child Health in Sub-Saharan Africa
Source: Front Public Health. 2021 Jul 14;9:643621. doi: 10.3389/fpubh.2021.643621 (PMC8316722; doi:10.3389/fpubh.2021.643621)
Supplement: Supplementary file 3 [file Table_3.XLSX]

## Sheet: Data extraction
Study ID		A	2	3	4	5	6	7		8	9	10	13	13
Article	Authors	Laura Robertson et al.	Jessica Bliss et al.	Laura Adubra et al.	Agnes La Port et al.	Ugo Okoli et al	Jenny X. Liu et al.	Akresh R. et al	Evans D et. Al	Evans D. et al	Marcel Yotebieng et al.	Ebenezer Awusu-addo et al
	Date published	2013	2018	2019	2019	2014	2019	2012	2014	2016	2016	2016
	Journal	Lancet	Journal of Global health	American journal of clinical nutrition	Current developments in nutrition	BMC pregnancy and childbirth	BMC pregnancy and childbirth	world Bank. Policy Research working paper		world Bank study	Lancet HIV	Health promotion international
	Reason for inclusion/Dimension of	impact	impact	impact	pathway	impact	impact	impact		impact	impact	pathways
Program information	Country	Zimbabwe	Niger	Mali	Mali	Nigeria	Nigeria	Burkina faso		Tanzania	DRC	Ghana
	Program	Manicaland HIV/STD prevention project	concern worldwide CCT programme	SNACK + CAN	SNACK + CAN	SURE-P MCH	NA	Nahourio CTPP		TASAF	NA	LEAP
	Locality (Rural/Urban)	Rural	Rural	Rural	Rural	Rural	Rural/Urban	Rural		Rural	Urban	rural
	Situation (Emergency/pilot/research/poverty alleviation)	Pilot	Emergency	Pilot	Pilot	Pilot	Research	pilot		Pilot	Research	pilot
	Year initiated	2010	2012	2014	2014	2103	2015	2008		2010	2013	2008
	Targeting mechanism (geographic/household/staged)	Staged (Geographic/Household)	Household (based on poverty levels)	Geographic	Geographic	Geographic	NA	staged (Geographic/Household)		Staged (Geographic/Household)	NA	household
	Targeting done by	Community + asset index	Implementer	implementer	implementer	implementer	NA	implementer		community	NA	implementer
	Cash transferred (USD)	$18 for household, $4 per child to max 3/ 2 months	$250 over 3 months	About $96 over pregnancy - 24 months ($4/vaccination, $3 /Growth monitor)	About $96 over pregnancy - 24 months ($4/vaccination, $3 /Growth monitor)	$30 over pregnancy/post-natal	$20 at EID ($114 in 3 intallments)	$9.64/child/year (no max)		$14.5 ($12 - $36) bimonthly	Max $45	$21 - $39 per month (plus possible free insurance)
	Cash recipient (female/male/Not stated)	Not stated	female	Female	Female	Female	Female	Female or male		Not stated	Female	female/male
country context	what was the political sitution?	ZANU-PF led, power sharing government. Still unstable, increasing international isolation	Recent election, political instability, following military rule for 1 year.	politically unstable, Northern conflict with Tuareg and Ansar Dine. Coup in 2012. Peace deal in 2013.	politically unstable, Northern conflict with Tuareg and Ansar Dine. Coup in 2012. Peace deal in 2013.	Politically unstable, democratically weak. Militant insurgency in NE region	Politically unstable, democratically weak. Militant insurgency in NE region	Weak democracy, Blaise Compaore long serving leadership			Led by Jospeh Kabila	Election year, Atta-Mills wins with slim margin
	what was the social situation? Include security	Economic decline,	widespread poverty, worsened by famine. Tuareg insurgency and islamist insurgency (al-qaeda)	insecurity in North, widespread poverty	insecurity in North, widespread poverty	MCHC was free in most states in country	HIV care free, High MTCT rates and underutilization	stable relatively.			significant security concerns in Kivu and Goma. M23, govt forces and other militia acused of war crimes
	what was per capita GNI? (worldbank Atlas) at time of intervention	$630 (2011)	$380 (2010)	$810 (2014)	$810 (2014)	$2720 (2013)	$2880 (2015)	$520 (2008)		$ 720 (2010)	$410 (2013)	$ 1140 (2008)
	what was ppverty level at national lines (%)	72.3% (2011)	48.9% (2011)	41.1% (2009)	41.1% (2009)	46% (2009)	46% (2009)	46.7% (2009)		28.2% (2011)	63.9% (2012)	24.2% (2012)
	what was poverty level at $1.9 per day? (%)	21.4% (2011)	50.3% (2011)	49.7% (2009)	49.7% (2009)	53.5% (2009)	53.5% (2009)	55.3% (2008)		49% (2011)	76.6% (2012)	12% (2012)
	what was Gini index	Not stated	31.5 (2011)	33% (2009)	33% (2009)	43% (2009)	43% (2009)	39.8 (2009)		37.8 (2011)	42.1 (2012)	42.4 (2012)
	Health workforce_doctors/10,000 (WHO)	1.27 (2010)	0.5 (2013)	1.07 (2012)	1.07 (2012)	3.8 (2013)	3.8 (2013)	0.3 (2008)		0.3 (2012)	0.9 (2013)	0.8 (2008)
	Health workforce_nurses/10,000 (WHO)	8.3 (2010)	2.2 (2013)	1.2 (2013) Sharp drop	1.2 (2013) Sharp drop	10.3 (2013)	10.3 (2013)	3.7 (2008)		4.4 (2012)	8.6 (2013)	9.7 (2008)
	OPP payment (% of CHE)(WHO)	34% (at 2010)	61% (2012)	34% (2014)	34% (2014)	71% (2013)	72% (2014)	33% (2008)		45% (2011)	39% (2013)	41% (2008)
Cash transfer conditions	Describe supply-side interventions	Not included	2 concurrent nutrition programs in the same region, include CMAM	SNACK intervention (management of malnutrition, blanket feeding, gardens, BCC)	SNACK intervention (management of malnutrition, blanket feeding, gardens, BCC)	Yes, SURE-P health facility ungrade and VHW in communities	Not stated	None included				NHI scheme in place
	Vaccination (Y/N)	Yes	No	Yes	Yes	Yes (OPV at birth)	No	No		Yes	N	No
	Preventivie vists (Y/N)	Yes	No	Yes	Yes	No	Yes (EID and Nevirapine admin)	Yes		Yes	Y	Yes (include register with NHIS)
	Health/Nutrition education (Y/N)	Yes	Yes	No (part of SNACK package)	No (part of SNACK package)	No	No	No		No	N	No
	Food supplementation (Y/N)	Not detailed (households given grains)	No	No (part of SNACK package)	No (part of SNACK package)	No	No	No		No	N	No
	Education (Y/N)	Yes	No	No (part of SNACK package)	N (part of SNACK package)	No	No	Yes		Yes	N	Yes
Evaluation	Baseline	2009	2012	Nov-Dec 2013	NA	2012	NA	2008-06-01		2009	Nil	NA
	Year evaluated	2011	2012	Nov-Dec 2016		2014	2015/6	2009/10		2012	2014	NA
	Evaluation design	Matched CRCT	Quasi-Exp	CRCT	Mixed methods	Quasi-experimental	individual RCT	CRCT (5 arms)	CRT (mixed methods)	Cluster randomised trial	RCT	Quantitative
	Population	0 - 59	06-24 months	12-42 months	Mothers of beneficiaries and front-line workers at CHC	<6 weeks	<6 weeks	<60 months		< 5 years	< 6 weeks	caregivers of OVC, community leaders and program implementers
	Baseline group	No intervention	No intervention	SNACK	NA	22 control cluster	Control	Control cluster (15)		40 control villages/40 CCT village		NA
	Type of analysis	Diff. at end, ITT	Diff-in-Diff	regression analysis (SNACK+Cash VS SNACK)	Themaic analysis	Time-series	ITT	Linear regression		linear regression	ITT	Thematic analysis (inductive)
	data collection technique	Survey	Survey	Survey	Survey, semi-structured observation, semi-structured individual interview, group free-listing	Health facility records	Extraction from records	Survey	survey	survey	Extraction of records	sem--structured individual interviews
	health service use evaluated	Yes, vaccination	No	vaccination, growth monitoring	NA	OPV vaccination	EID and Nevirapine admin at birth	health centre visits	health visits	health centre visits	Yes, EID
	health outcomes evaluated	No	No	self-reported illness in past 15 days	NA	No	No	No	illness in past 30 days, number of illdays in past 30 days	illness in past 30 days, number of ill days in past 30days
	nutritional outcomes evaluated	No	weight, WHZ, MUAC	HAZ, stunting prevalence	NA	No	No	No	height, weight, HAZ, WAZ<WHZ, MUAC	height, weight, HAZ, WAZ, WHZ, MUAC
	Dietary intake/consumption evaluated	No	breastfeeding in past 24hrs, dietary frequency in past 24hrs, dietary diversity in past 24hr	24 hour Dietary diversity, Dietary frequency	NA	No	No	No	household consumptions	not included
	Context detailed in evaluation?	Not detailed	yes (not detailed)	Yes (detailed)	Yes	Yes	No	Yes (not detailed)	yes (local level)	Yes (not at local level)	No	No
	Process evaluation conducted?	No	No	No	Yes	No	No	No	Not detailed	No	Yes (but not cash disbursements)	No
vaccination	outcome 1	No significant difference in proportion of children with UTD vaccination records		No diff. in vaccination rate		No change in vaccination rates for OPV
	outcome 2			no diff. in vaccination attendance
	outcome 3
preventive	outcome 1			No diff. in growth monitoring visits			Neonates of recipient more likely to receive EID (Or 2.24, CI 1.24-3.53)	0.43 more routine visit per year in CCT vs control	no significant difference in HC visits at midline and endline.	CCt group 2.3 more visits in past year at midline	No diff in proportion of infants undergoing EID
	outcome 2						No diff in Nevirapin administration at birth	0.45 more vists when mother received CCT vs control, not significant when fathers receive. No significant difference in estimated of CCTm and CCTf		no significant difference at endline
	outcome 3							0.48 more visits for girls receiving CCT, no observed for boys. No difference by recipient
curative	outcome 1
	outcome 2
	outcome 3
diet	outcome 1		Significant increase in meal frequency and diversity						at household level: greater spending on womens clothes. More produced maize, more consumption of rice, dried beans and sugar. No increase in consumption of harmful comodities (p66 and p121)
	outcome 2		significant increase in consumption of animal protein and legumes, not milk, cereal etc	No difference in feeding practices (diversity or frequency)
	outcome 3		No difference in breastfeeding
nutrition	outcome 1		Significantly higher weight difference, WHZ and MUAC	No difference in HAZ					No difference in anthropometic measures (p63 and p105)	No difference in Anthropometic measures
	outcome 2			No diff in stunting prevalence
	outcome 3
health	outcome 1		no stat diff in reported illness	No diff in illness reports in preceding 15 days					no difference in reported illness in past 30 days (p95)	no significant diff in reported illness in preceding 4 weeks
	outcome 2								no difference in number of days ill in the past 30days	significant decline in illness days in past 30 days (-0.76 from 1.05 at baseline)
	outcome 3
Pathway or intermediate outcomes	outcome 1			No diff in knowledge on health and nutrition.	On use of cash: (1). 56.6% report using money for food (Qual). (2.) 74% in survey used for food (Quan). (3) 27.3% VS 9.9% reported using for medicines and transport (Quan vs Qual).				FGD; suggests greater use of CT to puchase food, but also insurance and especially educational use			nutrition PW: 1. spend cash transfers on food 2. less dependence on own money 3. children were less hungry 4. transfer not limited to beneficiary but shared (number of dependents) 5. increase household income
	outcome 2			women stated to use the cash for food and pay for childs health expenses	On incentives (cash value): 1.)FW satisfied with amount given as motivation " Most of the FLWs were also satisfied with the amount ofcash given to mothers, because they felt it motivated women to come to the CHC." 2.)FW reported improved decision and autonomy for mothers "It is really helpful … thanks to the money … they manage some personal things, without the help of their husband” (FLW_9)". 3.…							Hsutilization PW: 1. more likely to go to hospital 2. more likely to register for NHIS 3. removal financial barriers 4. purchase medicines 5. use for buying drugs OTC
	outcome 3				On incentives (motivation to attend clinic): 1.)Most mothers did not cite cash as a major reason to attend clnic. 2.) mothers cited geographic access as obstacle to attending clinics 3.) cash may not be enough to cover clinic bills "Among FLWs, 1 head of a CHC stated that the cash was good as an incentive to increase attendance at the CHCs, but was not enough to cover medical expenses". 4.) ineff…							greater feeling of wellbeing among caregivers and children
	agency conducting CCT	Wellcome trust, WB, Unicef	concern worldwide	Global affairs Canada, WFP and unicef		SURE-P MCH,children investment fund foundation, Mckinsey & Compacy	New Incentives	NBER Africa Project and the following World Bank trust fund grants: Strategic Impact Evaluation Fund (SIEF), Bank-Netherlands Partnership Program (BNPP), Gender Action Plan (GAP), Knowledge for Change Program (KCP), WB-DFID Evaluation of the Community Response to HIV and AIDS, and Luxembourg Poverty Reduction Partnership (LPRP)
other	agency conducting evaluation	Wellcome trust, WB, Unicef	Concern			SURE-P MCH
	agency funding evaluation	Wellcome trust, WB, Unicef	Concern	EU with support from unicef, wfp, French NISD, IFPRA		SURE-P MCH	Bill & melinda Gates
Notes		2 villages in a control cluster received intervention, for an ITT this would result in reduced effect size (differential misclassification)	Intervention-control group were not comparable at baseline, intervention group more malnourished at baseline	The control were part of extensive nutrition program SNACK		payment disbursed after meeting condition	information on confounders like previous birth etc not collected	No observed difference by level of poverty
			control group were however less vulnerable so could have been less sensitive to the effect of CCT	high vaccination levels at baseline (explains no effect)		issue: outcomes collected from registers at health facilities	intervention arm received reminders, outcome achievement aids	Multiple analysis performed, some associations appear spurious (?? P-hacking). Eg no association between CCTf but CCTf becomes relevant for girls
			Short follow-up period of about 3 month	CCT and control groups showed improvement in most outcomes from baseline		issue: denominator is catchment pouplation (? Numerator may include some outside area)	EID was overall low in both arms (26.2% in CCT, 13.4% in control)	CCT effect 0.6 in older children 24-59 months
			assessors not blinded to grouping				Randomisation procedure appear flawed. Randomised before eligibility assessed. So after randomisation some were ineligible
			Control group not matched, not randomised!!				Ethical flaws as IC not obtained from control arm. Also permission not sought from pregnant women before their names given to CCT officer

## Sheet: quality assessment - Quan
Authors	Laura Robertson et al.	Jessica Bliss et al.	Laura Adubra et aal.	Ugo Okoli et al	Jenny X. Liu et al.	Akresh R. et al	Evans D. eta l	Marcel Yotebieng et al.
Date published	2013	2018	2019	2014	2019	2012/16	2014	2016
Journal	Lancet	Journal of Global health	American journal of clinical nutrition	BMC pregnancy and childbirth	BMC pregnancy and childbirth	world Bank. Policy Research working paper	world Bank study	Lancet HIV
Methodology
Was the method appropriate?	Yes	Yes	Yes	Yes	Yes	Yes	Yes	Yes
How was confounding controlled?	Randomisation	regression	Randomisation	Unclear (purposively sampled)	Unclear (likely flawed)	Randomisation	Cluster randomisation	Randomisation + regression
Randomisation done?	Yes	No	Yes	No	Randomisation Flawed (self selection)	Yes	Yes	Yes
were observers blinded?	No	No	No	No	No	No	unclear	No
Was the sample size justified?	Yes	No	Yes	No	Yes	No	No	Yes
Any events in conduct that risk randomisation or blinding?	Yes (2 villages in control received cash)	Yes	No	Not applicable	Randomisation occurred before inclusion, so eventual CCT group was self-selected	Not obvious	Yes (some contamination but minimal)	No
Were objective methods applied to collect information?	unclear	Yes	Yes	Yes (facility records)	Yes (hospital records; could abstractors have influence utilisation rates?)	No	No (anthropometry assessed objectively	Yes
Was the analysis appropriate?	Yes	Yes	Yes	Yes	Yes	Yes	Yes (main analysis, risk of FD)	Yes
Were comparison groups comparable at baseline?	Yes	No	Yes	NA	Unclear	Yes	Yes	Yes
was outcome missing in 5% or more?	No	No	NA	NA	No	No	No	Yes
was drop-out rate different between groups?	No	No	NA	NA	No	Unclear	No	No
was there a potential conflict of interest?	Yes	Yes	Yes	Yes	Yes	Yes	Yes	Yes
overall statement	significant risk of information bias	risk of residual confounding, random error and selection and information bias	significant risk of information bias	Risk of confounding and bias	Significant risk of confounding, selection bias and information bias	Risk of confounding and information bias	Risk of confounding and information bias, and COI	Risk of information bias
Response guide
Yes
No
Unclear
Not stated
Not applicable
							0

## Sheet: quality assessment - Qual
Author	Agnes La Port et al.	Ebenezer awusu-Addo
Date published	2019
Journal
Method
Scope and purpose	Clear rationale, objective and aim	Clear and rational objectibe
Design	design appropriate and consistent with objective	appropriate design
	Data collection method described and appripriate	individual interviews detailed, but other methods could have been included
Sampling strategy	Sample size not justified	justified by saturation
	Sampling strategy detailed, clearly documented	Purposive strategy justified on area level, but not on individual level
Analysis	analysis described in text	Thematic analysis described.
Interpretation	appropriate interpretation of finding.	appropriate, included discussion of possible bias. However, claims triangulation of information. ?? Use of multiple methods
Reflexivity	Not clear	Discussed in some way
Ethical dimensions	Ethical clearance obtained, consent obtained. Confidentiality ??	Ethical clearance obtained, confidentiality discussed. Informed consent obtained
Relevance and transferability	within similar context	relevant and transferable as it develops a PIP
